# Supplementary material for: DUCT reveals architectural mechanisms contributing to bile duct recovery in a mouse model for Alagille syndrome
Source: eLife journal article supplement (doi:10.7554/elife.60916), 2021-02-26
Supplement: fig1-figsupp4-data1 [file elife-60916-fig1-figsupp4-data1-v1.pdf]

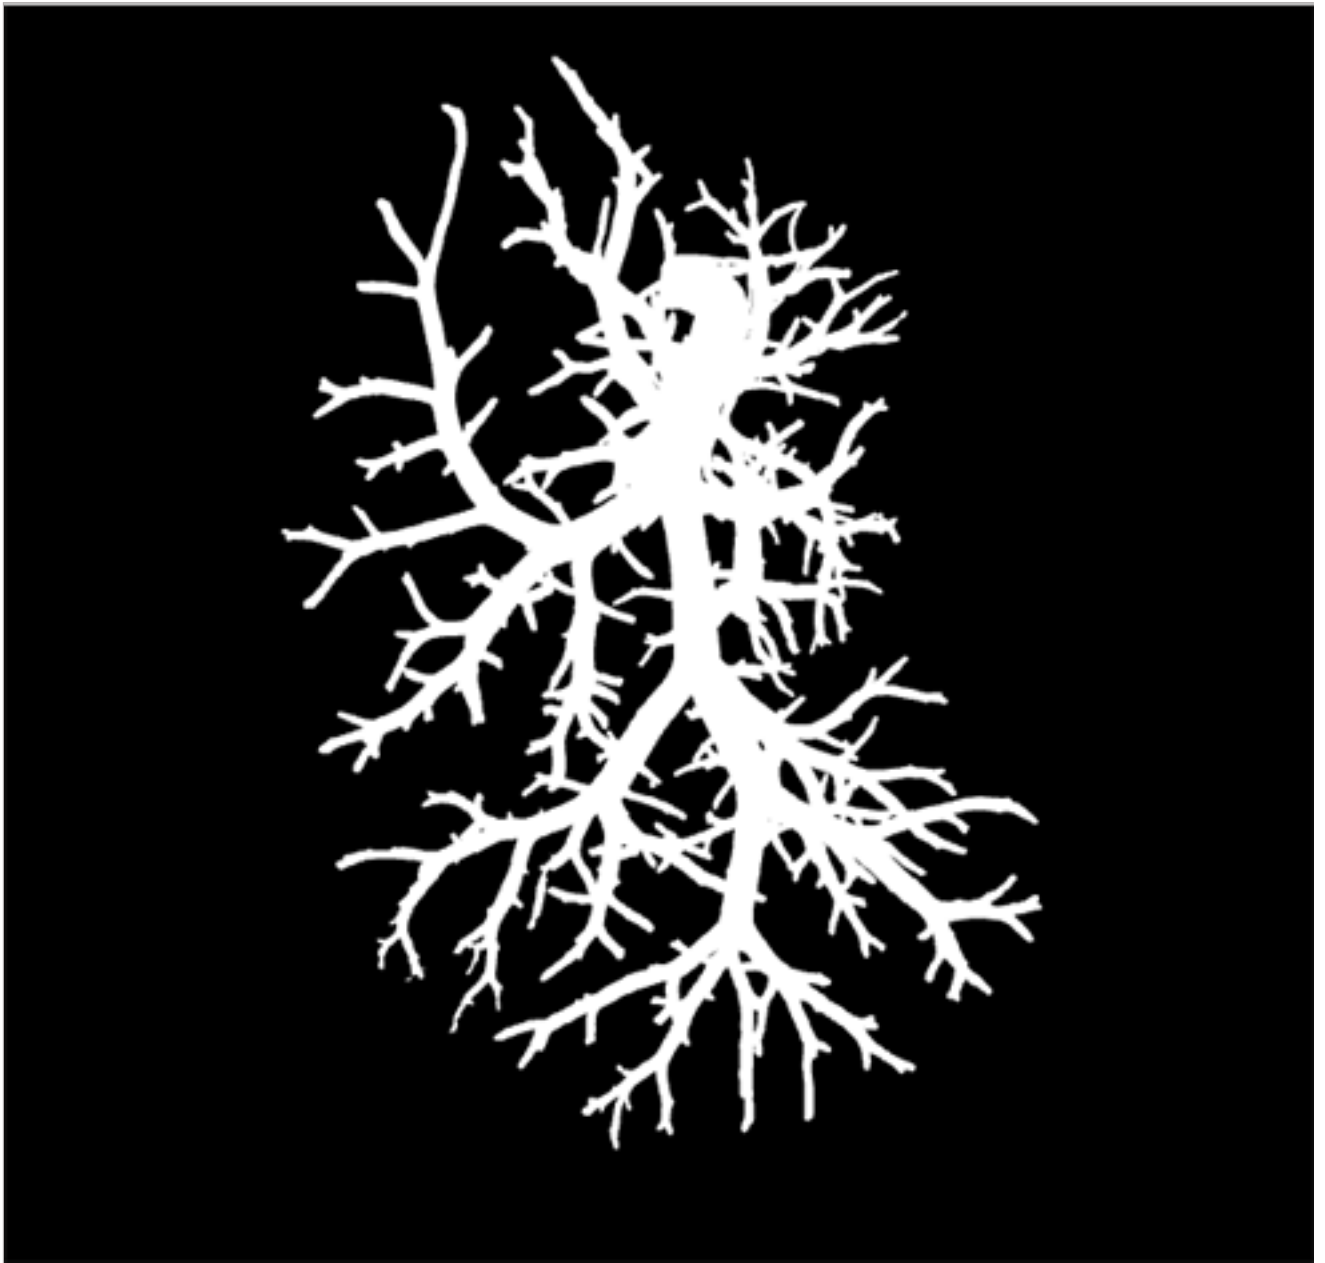

BD+PV

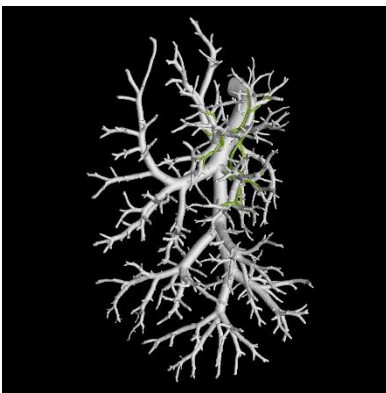

BD

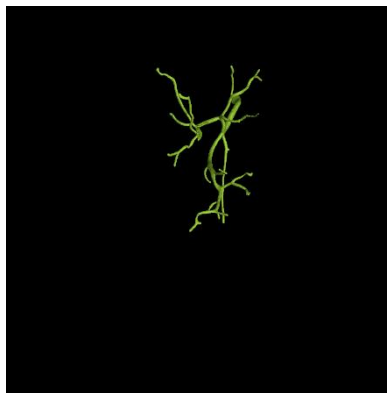

PV

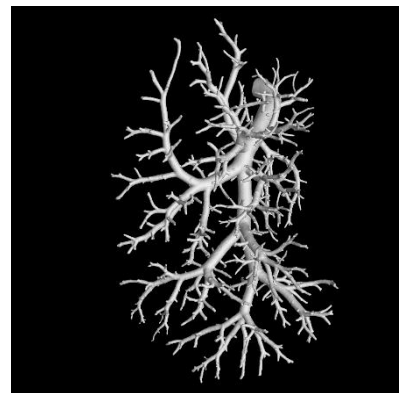

**Figure 1 – figure supplement 4. 3D interactive liver cast.** Liver cast of P15 *Jag1<sup>Ndr/Ndr</sup>* showing bile duct (green) and portal vein (white) together (top panel) or separately (bottom panels), full rotation, available only online or .pdf.
