# Supplementary material for: DUCT reveals architectural mechanisms contributing to bile duct recovery in a mouse model for Alagille syndrome
Source: eLife. 2021 Feb 26;10:e60916. doi: 10.7554/eLife.60916 (PMC7909953; doi:10.7554/eLife.60916)
Supplement: Figure 3—source data 1. [file elife-60916-fig3-data1.xlsx]

## Sheet: Sheet1
Jag1+/+	2404	2431	2713	Jag1Ndr/Ndr	2401	2405	2714		Jag1+/+	2404	2431	2713	2401	2405	2714	Jag1Ndr/Ndr	Jag1+/+	2404	2431	2713	2401	2405	2714	Jag1Ndr/Ndr
Total amount of pix	5130	10943	10776		10429	7480	9158
Distance (mm)	Count (pixels)				Count (pixels)				Distance (mm)	pixel count in %							Distance (mm)	cumulative sum of pixel count %
0.015	3708	10141	10173		9062	6060	8658		0.015	72.2807	92.6711	94.4042	86.8923	81.016	94.5403		0.015	72.2807	92.6711	94.4042	86.8923	81.016	94.5403
0.03	575	191	200		281	570	156		0.03	11.2086	1.74541	1.85598	2.69441	7.62032	1.70343		0.03	83.4893	94.4165	96.2602	89.5867	88.6364	96.2437
0.045	264	106	119		167	250	56		0.045	5.1462	0.968656	1.10431	1.6013	3.34225	0.611487		0.045	88.6355	95.3852	97.3645	91.188	91.9786	96.8552
0.06	145	66	51		123	164	38		0.06	2.82651	0.603125	0.473274	1.1794	2.19251	0.414938		0.06	91.462	95.9883	97.8378	92.3674	94.1711	97.2701
0.075	128	76	54		95	99	35		0.075	2.49513	0.694508	0.501114	0.910921	1.32353	0.38218		0.075	93.9571	96.6828	98.3389	93.2784	95.4947	97.6523
0.09	83	62	46		50	46	29		0.09	1.61793	0.566572	0.426875	0.479432	0.614973	0.316663		0.09	95.575	97.2494	98.7658	93.7578	96.1096	97.969
0.105	56	34	42		41	23	42		0.105	1.09162	0.310701	0.389755	0.393135	0.307487	0.458615		0.105	96.6667	97.5601	99.1555	94.1509	96.4171	98.4276
0.12	35	22	30		37	20	28		0.12	0.682261	0.201042	0.278396	0.35478	0.26738	0.305744		0.12	97.3489	97.7611	99.4339	94.5057	96.6845	98.7333
0.135	33	9	18		41	3	21		0.135	0.643275	0.0822444	0.167038	0.393135	0.040107	0.229308		0.135	97.9922	97.8434	99.601	94.8988	96.7246	98.9627
0.15	24	9	7		28	5	13		0.15	0.467836	0.0822444	0.0649592	0.268482	0.0668449	0.141952		0.15	98.46	97.9256	99.6659	95.1673	96.7914	99.1046
0.165	17	4	7		17	6	18		0.165	0.331384	0.036553	0.0649592	0.163007	0.0802139	0.196549		0.165	98.7914	97.9622	99.7309	95.3303	96.8717	99.3012
0.18	11	6	10		14	5	6		0.18	0.214425	0.0548296	0.0927988	0.134241	0.0668449	0.0655165		0.18	99.0058	98.017	99.8237	95.4646	96.9385	99.3667
0.195	23	12	3		40	1	4		0.195	0.448343	0.109659	0.0278396	0.383546	0.013369	0.0436777		0.195	99.4542	98.1267	99.8515	95.8481	96.9519	99.4104
0.21	15	17	3		19	9	7		0.21	0.292398	0.15535	0.0278396	0.182184	0.120321	0.0764359		0.21	99.7466	98.282	99.8794	96.0303	97.0722	99.4868
0.225	7	8	2		10	3	1		0.225	0.136452	0.0731061	0.0185598	0.0958865	0.040107	0.0109194		0.225	99.883	98.3551	99.8979	96.1262	97.1123	99.4977
0.24	0	8	2		11	2	2		0.24	0	0.0731061	0.0185598	0.105475	0.026738	0.0218388		0.24	99.883	98.4282	99.9165	96.2317	97.139	99.5195
0.255	1	12	1		9	3	0		0.255	0.0194932	0.109659	0.00927988	0.0862978	0.040107	0		0.255	99.9025	98.5379	99.9258	96.318	97.1791	99.5195
0.27	1	15	2		27	8	0		0.27	0.0194932	0.137074	0.0185598	0.258893	0.106952	0		0.27	99.922	98.675	99.9443	96.5769	97.2861	99.5195
0.285	1	3	1		4	7	0		0.285	0.0194932	0.0274148	0.00927988	0.0383546	0.0935829	0		0.285	99.9415	98.7024	99.9536	96.6152	97.3797	99.5195
0.3	1	5	4		9	2	3		0.3	0.0194932	0.0456913	0.0371195	0.0862978	0.026738	0.0327582		0.3	99.961	98.7481	99.9907	96.7015	97.4064	99.5523
0.315	1	3	1		14	3	5		0.315	0.0194932	0.0274148	0.00927988	0.134241	0.040107	0.0545971		0.315	99.9805	98.7755	100	96.8357	97.4465	99.6069
0.33	0	7	0		9	4	3		0.33	0	0.0639678	0	0.0862978	0.0534759	0.0327582		0.33	99.9805	98.8394	100	96.922	97.5	99.6397
0.345	1	17	0		5	2	1		0.345	0.0194932	0.15535	0	0.0479432	0.026738	0.0109194		0.345	100	98.9948	100	96.97	97.5267	99.6506
0.36	0	29	0		6	6	3		0.36	0	0.26501	0	0.0575319	0.0802139	0.0327582		0.36	100	99.2598	100	97.0275	97.607	99.6833
0.375	0	14	0		8	11	3		0.375	0	0.127936	0	0.0767092	0.147059	0.0327582		0.375	100	99.3877	100	97.1042	97.754	99.7161
0.39	0	18	0		8	8	8		0.39	0	0.164489	0	0.0767092	0.106952	0.0873553		0.39	100	99.5522	100	97.1809	97.861	99.8035
0.405	0	11	0		19	24	7		0.405	0	0.100521	0	0.182184	0.320856	0.0764359		0.405	100	99.6527	100	97.3631	98.1818	99.8799
0.42	0	9	0		17	18	7		0.42	0	0.0822444	0	0.163007	0.240642	0.0764359		0.42	100	99.735	100	97.5261	98.4225	99.9563
0.435	0	5	0		17	8	3		0.435	0	0.0456913	0	0.163007	0.106952	0.0327582		0.435	100	99.7807	100	97.6891	98.5294	99.9891
0.45	0	2	0		4	11	1		0.45	0	0.0182765	0	0.0383546	0.147059	0.0109194		0.45	100	99.799	100	97.7275	98.6765	100
0.465	0	6	0		4	6	0		0.465	0	0.0548296	0	0.0383546	0.0802139	0		0.465	100	99.8538	100	97.7658	98.7567	100
0.48	0	7	0		9	11	0		0.48	0	0.0639678	0	0.0862978	0.147059	0		0.48	100	99.9178	100	97.8521	98.9037	100
0.495	0	5	0		10	4	0		0.495	0	0.0456913	0	0.0958865	0.0534759	0		0.495	100	99.9634	100	97.948	98.9572	100
0.51	0	1	0		21	6	0		0.51	0	0.00913826	0	0.201362	0.0802139	0		0.51	100	99.9726	100	98.1494	99.0374	100
0.525	0	0	0		22	7	0		0.525	0	0	0	0.21095	0.0935829	0		0.525	100	99.9726	100	98.3603	99.131	100
0.54	0	3	0		2	0	0		0.54	0	0.0274148	0	0.0191773	0	0		0.54	100	100	100	98.3795	99.131	100
0.555	0	0	0		21	2	0		0.555	0	0	0	0.201362	0.026738	0		0.555	100	100	100	98.5809	99.1578	100
0.57	0	0	0		8	0	0		0.57	0	0	0	0.0767092	0	0		0.57	100	100	100	98.6576	99.1578	100
0.585	0	0	0		0	2	0		0.585	0	0	0	0	0.026738	0		0.585	100	100	100	98.6576	99.1845	100
0.6	0	0	0		0	0	0		0.6	0	0	0	0	0	0		0.6	100	100	100	98.6576	99.1845	100
0.615	0	0	0		0	1	0		0.615	0	0	0	0	0.013369	0		0.615	100	100	100	98.6576	99.1979	100
0.63	0	0	0		0	4	0		0.63	0	0	0	0	0.0534759	0		0.63	100	100	100	98.6576	99.2513	100
0.645	0	0	0		0	0	0		0.645	0	0	0	0	0	0		0.645	100	100	100	98.6576	99.2513	100
0.66	0	0	0		2	5	0		0.66	0	0	0	0.0191773	0.0668449	0		0.66	100	100	100	98.6768	99.3182	100
0.675	0	0	0		4	7	0		0.675	0	0	0	0.0383546	0.0935829	0		0.675	100	100	100	98.7151	99.4118	100
0.69	0	0	0		13	10	0		0.69	0	0	0	0.124652	0.13369	0		0.69	100	100	100	98.8398	99.5455	100
0.705	0	0	0		8	13	0		0.705	0	0	0	0.0767092	0.173797	0		0.705	100	100	100	98.9165	99.7193	100
0.72	0	0	0		7	1	0		0.72	0	0	0	0.0671205	0.013369	0		0.72	100	100	100	98.9836	99.7326	100
0.735	0	0	0		6	0	0		0.735	0	0	0	0.0575319	0	0		0.735	100	100	100	99.0411	99.7326	100
0.75	0	0	0		0	0	0		0.75	0	0	0	0	0	0		0.75	100	100	100	99.0411	99.7326	100
0.765	0	0	0		13	3	0		0.765	0	0	0	0.124652	0.040107	0		0.765	100	100	100	99.1658	99.7727	100
0.78	0	0	0		4	2	0		0.78	0	0	0	0.0383546	0.026738	0		0.78	100	100	100	99.2041	99.7995	100
0.795	0	0	0		0	2	0		0.795	0	0	0	0	0.026738	0		0.795	100	100	100	99.2041	99.8262	100
0.81	0	0	0		3	0	0		0.81	0	0	0	0.0287659	0	0		0.81	100	100	100	99.2329	99.8262	100
0.825	0	0	0		1	0	0		0.825	0	0	0	0.00958865	0	0		0.825	100	100	100	99.2425	99.8262	100
0.84	0	0	0		4	1	0		0.84	0	0	0	0.0383546	0.013369	0		0.84	100	100	100	99.2809	99.8396	100
0.855	0	0	0		3	0	0		0.855	0	0	0	0.0287659	0	0		0.855	100	100	100	99.3096	99.8396	100
0.87	0	0	0		1	0	0		0.87	0	0	0	0.00958865	0	0		0.87	100	100	100	99.3192	99.8396	100
0.885	0	0	0		4	0	0		0.885	0	0	0	0.0383546	0	0		0.885	100	100	100	99.3576	99.8396	100
0.9	0	0	0		9	0	0		0.9	0	0	0	0.0862978	0	0		0.9	100	100	100	99.4439	99.8396	100
0.915	0	0	0		5	0	0		0.915	0	0	0	0.0479432	0	0		0.915	100	100	100	99.4918	99.8396	100
0.93	0	0	0		3	0	0		0.93	0	0	0	0.0287659	0	0		0.93	100	100	100	99.5206	99.8396	100
0.945	0	0	0		8	1	0		0.945	0	0	0	0.0767092	0.013369	0		0.945	100	100	100	99.5973	99.8529	100
0.96	0	0	0		18	1	0		0.96	0	0	0	0.172596	0.013369	0		0.96	100	100	100	99.7699	99.8663	100
0.975	0	0	0		6	0	0		0.975	0	0	0	0.0575319	0	0		0.975	100	100	100	99.8274	99.8663	100
0.99	0	0	0		5	0	0		0.99	0	0	0	0.0479432	0	0		0.99	100	100	100	99.8753	99.8663	100
1.005	0	0	0		5	0	0		1.005	0	0	0	0.0479432	0	0		1.005	100	100	100	99.9233	99.8663	100
1.02	0	0	0		2	0	0		1.02	0	0	0	0.0191773	0	0		1.02	100	100	100	99.9425	99.8663	100
1.035	0	0	0		2	0	0		1.035	0	0	0	0.0191773	0	0		1.035	100	100	100	99.9616	99.8663	100
1.05	0	0	0		1	0	0		1.05	0	0	0	0.00958865	0	0		1.05	100	100	100	99.9712	99.8663	100
1.065	0	0	0		1	0	0		1.065	0	0	0	0.00958865	0	0		1.065	100	100	100	99.9808	99.8663	100
1.08	0	0	0		2	0	0		1.08	0	0	0	0.0191773	0	0		1.08	100	100	100	100	99.8663	100
1.095	0	0	0		0	0	0		1.095	0	0	0	0	0	0		1.095	100	100	100	100	99.8663	100
1.11	0	0	0		0	0	0		1.11	0	0	0	0	0	0		1.11	100	100	100	100	99.8663	100
1.125	0	0	0		0	0	0		1.125	0	0	0	0	0	0		1.125	100	100	100	100	99.8663	100
1.14	0	0	0		0	0	0		1.14	0	0	0	0	0	0		1.14	100	100	100	100	99.8663	100
1.155	0	0	0		0	0	0		1.155	0	0	0	0	0	0		1.155	100	100	100	100	99.8663	100
1.17	0	0	0		0	0	0		1.17	0	0	0	0	0	0		1.17	100	100	100	100	99.8663	100
1.185	0	0	0		0	1	0		1.185	0	0	0	0	0.013369	0		1.185	100	100	100	100	99.8797	100
1.2	0	0	0		0	1	0		1.2	0	0	0	0	0.013369	0		1.2	100	100	100	100	99.893	100
1.215	0	0	0		0	1	0		1.215	0	0	0	0	0.013369	0		1.215	100	100	100	100	99.9064	100
1.23	0	0	0		0	2	0		1.23	0	0	0	0	0.026738	0		1.23	100	100	100	100	99.9332	100
1.245	0	0	0		0	1	0		1.245	0	0	0	0	0.013369	0		1.245	100	100	100	100	99.9465	100
1.26	0	0	0		0	1	0		1.26	0	0	0	0	0.013369	0		1.26	100	100	100	100	99.9599	100
1.275	0	0	0		0	3	0		1.275	0	0	0	0	0.040107	0		1.275	100	100	100	100	100	100
1.29	0	0	0		0	0	0		1.29	0	0	0	0	0	0		1.29	100	100	100	100	100	100
1.305	0	0	0		0	0	0		1.305	0	0	0	0	0	0		1.305	100	100	100	100	100	100

## Sheet: Sheet2
Table Analyzed	Surface Bd to PV
Column A	Jag1+/+
vs.	vs.
Column B	Jag1Ndr/Ndr
Kolmogorov-Smirnov test
P value	< 0.0001
Exact or approximate P value?	Approximate
P value summary	****
Significantly different? (P < 0.05)	Yes
Kolmogorov-Smirnov D	0.41
