# Supplementary material for: DUCT reveals architectural mechanisms contributing to bile duct recovery in a mouse model for Alagille syndrome
Source: eLife. 2021 Feb 26;10:e60916. doi: 10.7554/eLife.60916 (PMC7909953; doi:10.7554/eLife.60916)
Supplement: Figure 4—source data 1. [file elife-60916-fig4-data1.xlsx]

## Sheet: Sheet1
Jag1+/+	2404	2431	2713	Jag1Ndr/Ndr	2401	2405	2714		Jag1+/+	2404	2431	2713	Jag1Ndr/Ndr	2401	2405	2714		Jag1+/+	2404	2431	2713	Jag1Ndr/Ndr	2401	2405	2714
Total count	41	61	96		100	30	47
Distance (mm)	Count				Count				Distance (mm)	Count in %								Distance (mm)	Cumulative sum count in %
0.015	0	0	0		0	0	0		0.015	0	0	0		0	0	0		0.015	0	0	0		0	0	0
0.03	0	0	0		0	0	0		0.03	0	0	0		0	0	0		0.03	0	0	0		0	0	0
0.045	0	0	0		0	0	0		0.045	0	0	0		0	0	0		0.045	0	0	0		0	0	0
0.06	0	0	0		0	0	0		0.06	0	0	0		0	0	0		0.06	0	0	0		0	0	0
0.075	1	0	0		0	0	0		0.075	2.43902	0	0		0	0	0		0.075	2.43902	0	0		0	0	0
0.09	2	1	1		0	0	0		0.09	4.87805	1.63934	1.04167		0	0	0		0.09	7.31707	1.63934	1.04167		0	0	0
0.105	1	2	1		0	0	2		0.105	2.43902	3.27869	1.04167		0	0	4.25532		0.105	9.7561	4.91803	2.08333		0	0	4.25532
0.12	2	4	6		4	1	2		0.12	4.87805	6.55738	6.25		4	3.33333	4.25532		0.12	14.6341	11.4754	8.33333		4	3.33333	8.51064
0.135	4	2	5		3	0	3		0.135	9.7561	3.27869	5.20833		3	0	6.38298		0.135	24.3902	14.7541	13.5417		7	3.33333	14.8936
0.15	1	3	8		2	1	1		0.15	2.43902	4.91803	8.33333		2	3.33333	2.12766		0.15	26.8293	19.6721	21.875		9	6.66667	17.0213
0.165	2	4	13		4	0	4		0.165	4.87805	6.55738	13.5417		4	0	8.51064		0.165	31.7073	26.2295	35.4167		13	6.66667	25.5319
0.18	1	4	7		7	0	3		0.18	2.43902	6.55738	7.29167		7	0	6.38298		0.18	34.1463	32.7869	42.7083		20	6.66667	31.9149
0.195	3	8	5		13	0	3		0.195	7.31707	13.1148	5.20833		13	0	6.38298		0.195	41.4634	45.9016	47.9167		33	6.66667	38.2979
0.21	5	3	5		9	0	2		0.21	12.1951	4.91803	5.20833		9	0	4.25532		0.21	53.6585	50.8197	53.125		42	6.66667	42.5532
0.225	2	5	5		6	1	3		0.225	4.87805	8.19672	5.20833		6	3.33333	6.38298		0.225	58.5366	59.0164	58.3333		48	10	48.9362
0.24	2	2	7		8	3	1		0.24	4.87805	3.27869	7.29167		8	10	2.12766		0.24	63.4146	62.2951	65.625		56	20	51.0638
0.255	4	1	2		5	0	4		0.255	9.7561	1.63934	2.08333		5	0	8.51064		0.255	73.1707	63.9344	67.7083		61	20	59.5745
0.27	2	4	6		3	3	2		0.27	4.87805	6.55738	6.25		3	10	4.25532		0.27	78.0488	70.4918	73.9583		64	30	63.8298
0.285	0	0	3		6	2	1		0.285	0	0	3.125		6	6.66667	2.12766		0.285	78.0488	70.4918	77.0833		70	36.6667	65.9574
0.3	1	3	1		8	1	1		0.3	2.43902	4.91803	1.04167		8	3.33333	2.12766		0.3	80.4878	75.4098	78.125		78	40	68.0851
0.315	0	3	2		4	0	2		0.315	0	4.91803	2.08333		4	0	4.25532		0.315	80.4878	80.3279	80.2083		82	40	72.3404
0.33	1	4	3		3	2	1		0.33	2.43902	6.55738	3.125		3	6.66667	2.12766		0.33	82.9268	86.8852	83.3333		85	46.6667	74.4681
0.345	2	3	2		4	2	1		0.345	4.87805	4.91803	2.08333		4	6.66667	2.12766		0.345	87.8049	91.8033	85.4167		89	53.3333	76.5957
0.36	1	3	3		1	1	2		0.36	2.43902	4.91803	3.125		1	3.33333	4.25532		0.36	90.2439	96.7213	88.5417		90	56.6667	80.8511
0.375	0	1	1		3	0	0		0.375	0	1.63934	1.04167		3	0	0		0.375	90.2439	98.3607	89.5833		93	56.6667	80.8511
0.39	3	1	0		0	0	1		0.39	7.31707	1.63934	0		0	0	2.12766		0.39	97.561	100	89.5833		93	56.6667	82.9787
0.405	1	0	0		1	3	3		0.405	2.43902	0	0		1	10	6.38298		0.405	100	100	89.5833		94	66.6667	89.3617
0.42	0	0	1		1	1	1		0.42	0	0	1.04167		1	3.33333	2.12766		0.42	100	100	90.625		95	70	91.4894
0.435	0	0	2		0	2	1		0.435	0	0	2.08333		0	6.66667	2.12766		0.435	100	100	92.7083		95	76.6667	93.617
0.45	0	0	0		0	1	1		0.45	0	0	0		0	3.33333	2.12766		0.45	100	100	92.7083		95	80	95.7447
0.465	0	0	1		0	0	0		0.465	0	0	1.04167		0	0	0		0.465	100	100	93.75		95	80	95.7447
0.48	0	0	2		0	1	0		0.48	0	0	2.08333		0	3.33333	0		0.48	100	100	95.8333		95	83.3333	95.7447
0.495	0	0	1		0	0	0		0.495	0	0	1.04167		0	0	0		0.495	100	100	96.875		95	83.3333	95.7447
0.51	0	0	0		1	0	0		0.51	0	0	0		1	0	0		0.51	100	100	96.875		96	83.3333	95.7447
0.525	0	0	1		0	0	0		0.525	0	0	1.04167		0	0	0		0.525	100	100	97.9167		96	83.3333	95.7447
0.54	0	0	0		0	1	0		0.54	0	0	0		0	3.33333	0		0.54	100	100	97.9167		96	86.6667	95.7447
0.555	0	0	0		0	0	0		0.555	0	0	0		0	0	0		0.555	100	100	97.9167		96	86.6667	95.7447
0.57	0	0	0		1	0	0		0.57	0	0	0		1	0	0		0.57	100	100	97.9167		97	86.6667	95.7447
0.585	0	0	0		0	0	1		0.585	0	0	0		0	0	2.12766		0.585	100	100	97.9167		97	86.6667	97.8723
0.6	0	0	0		0	0	0		0.6	0	0	0		0	0	0		0.6	100	100	97.9167		97	86.6667	97.8723
0.615	0	0	0		0	0	0		0.615	0	0	0		0	0	0		0.615	100	100	97.9167		97	86.6667	97.8723
0.63	0	0	0		0	0	1		0.63	0	0	0		0	0	2.12766		0.63	100	100	97.9167		97	86.6667	100
0.645	0	0	0		0	0	0		0.645	0	0	0		0	0	0		0.645	100	100	97.9167		97	86.6667	100
0.66	0	0	1		0	0	0		0.66	0	0	1.04167		0	0	0		0.66	100	100	98.9583		97	86.6667	100
0.675	0	0	0		0	0	0		0.675	0	0	0		0	0	0		0.675	100	100	98.9583		97	86.6667	100
0.69	0	0	0		2	0	0		0.69	0	0	0		2	0	0		0.69	100	100	98.9583		99	86.6667	100
0.705	0	0	0		0	0	0		0.705	0	0	0		0	0	0		0.705	100	100	98.9583		99	86.6667	100
0.72	0	0	0		1	0	0		0.72	0	0	0		1	0	0		0.72	100	100	98.9583		100	86.6667	100
0.735	0	0	0		0	0	0		0.735	0	0	0		0	0	0		0.735	100	100	98.9583		100	86.6667	100
0.75	0	0	0		0	0	0		0.75	0	0	0		0	0	0		0.75	100	100	98.9583		100	86.6667	100
0.765	0	0	0		0	1	0		0.765	0	0	0		0	3.33333	0		0.765	100	100	98.9583		100	90	100
0.78	0	0	0		0	0	0		0.78	0	0	0		0	0	0		0.78	100	100	98.9583		100	90	100
0.795	0	0	0		0	0	0		0.795	0	0	0		0	0	0		0.795	100	100	98.9583		100	90	100
0.81	0	0	0		0	0	0		0.81	0	0	0		0	0	0		0.81	100	100	98.9583		100	90	100
0.825	0	0	0		0	0	0		0.825	0	0	0		0	0	0		0.825	100	100	98.9583		100	90	100
0.84	0	0	0		0	0	0		0.84	0	0	0		0	0	0		0.84	100	100	98.9583		100	90	100
0.855	0	0	0		0	0	0		0.855	0	0	0		0	0	0		0.855	100	100	98.9583		100	90	100
0.87	0	0	1		0	0	0		0.87	0	0	1.04167		0	0	0		0.87	100	100	100		100	90	100
0.885	0	0	0		0	0	0		0.885	0	0	0		0	0	0		0.885	100	100	100		100	90	100
0.9	0	0	0		0	0	0		0.9	0	0	0		0	0	0		0.9	100	100	100		100	90	100
0.915	0	0	0		0	0	0		0.915	0	0	0		0	0	0		0.915	100	100	100		100	90	100
0.93	0	0	0		0	0	0		0.93	0	0	0		0	0	0		0.93	100	100	100		100	90	100
0.945	0	0	0		0	0	0		0.945	0	0	0		0	0	0		0.945	100	100	100		100	90	100
0.96	0	0	0		0	0	0		0.96	0	0	0		0	0	0		0.96	100	100	100		100	90	100
0.975	0	0	0		0	0	0		0.975	0	0	0		0	0	0		0.975	100	100	100		100	90	100
0.99	0	0	0		0	0	0		0.99	0	0	0		0	0	0		0.99	100	100	100		100	90	100
1.005	0	0	0		0	0	0		1.005	0	0	0		0	0	0		1.005	100	100	100		100	90	100
1.02	0	0	0		0	0	0		1.02	0	0	0		0	0	0		1.02	100	100	100		100	90	100
1.035	0	0	0		0	0	0		1.035	0	0	0		0	0	0		1.035	100	100	100		100	90	100
1.05	0	0	0		0	0	0		1.05	0	0	0		0	0	0		1.05	100	100	100		100	90	100
1.065	0	0	0		0	0	0		1.065	0	0	0		0	0	0		1.065	100	100	100		100	90	100
1.08	0	0	0		0	0	0		1.08	0	0	0		0	0	0		1.08	100	100	100		100	90	100
1.095	0	0	0		0	0	0		1.095	0	0	0		0	0	0		1.095	100	100	100		100	90	100
1.11	0	0	0		0	0	0		1.11	0	0	0		0	0	0		1.11	100	100	100		100	90	100
1.125	0	0	0		0	0	0		1.125	0	0	0		0	0	0		1.125	100	100	100		100	90	100
1.14	0	0	0		0	0	0		1.14	0	0	0		0	0	0		1.14	100	100	100		100	90	100
1.155	0	0	0		0	0	0		1.155	0	0	0		0	0	0		1.155	100	100	100		100	90	100
1.17	0	0	0		0	0	0		1.17	0	0	0		0	0	0		1.17	100	100	100		100	90	100
1.185	0	0	0		0	0	0		1.185	0	0	0		0	0	0		1.185	100	100	100		100	90	100
1.2	0	0	0		0	0	0		1.2	0	0	0		0	0	0		1.2	100	100	100		100	90	100
1.215	0	0	0		0	0	0		1.215	0	0	0		0	0	0		1.215	100	100	100		100	90	100
1.23	0	0	0		0	0	0		1.23	0	0	0		0	0	0		1.23	100	100	100		100	90	100
1.245	0	0	0		0	0	0		1.245	0	0	0		0	0	0		1.245	100	100	100		100	90	100
1.26	0	0	0		0	0	0		1.26	0	0	0		0	0	0		1.26	100	100	100		100	90	100
1.275	0	0	0		0	0	0		1.275	0	0	0		0	0	0		1.275	100	100	100		100	90	100
1.29	0	0	0		0	0	0		1.29	0	0	0		0	0	0		1.29	100	100	100		100	90	100
1.305	0	0	0		0	0	0		1.305	0	0	0		0	0	0		1.305	100	100	100		100	90	100
1.32	0	0	0		0	0	0		1.32	0	0	0		0	0	0		1.32	100	100	100		100	90	100
1.335	0	0	0		0	0	0		1.335	0	0	0		0	0	0		1.335	100	100	100		100	90	100
1.35	0	0	0		0	0	0		1.35	0	0	0		0	0	0		1.35	100	100	100		100	90	100
1.365	0	0	0		0	0	0		1.365	0	0	0		0	0	0		1.365	100	100	100		100	90	100
1.38	0	0	0		0	0	0		1.38	0	0	0		0	0	0		1.38	100	100	100		100	90	100
1.395	0	0	0		0	0	0		1.395	0	0	0		0	0	0		1.395	100	100	100		100	90	100
1.41	0	0	0		0	0	0		1.41	0	0	0		0	0	0		1.41	100	100	100		100	90	100
1.425	0	0	0		0	0	0		1.425	0	0	0		0	0	0		1.425	100	100	100		100	90	100
1.44	0	0	0		0	0	0		1.44	0	0	0		0	0	0		1.44	100	100	100		100	90	100
1.455	0	0	0		0	0	0		1.455	0	0	0		0	0	0		1.455	100	100	100		100	90	100
1.47	0	0	0		0	0	0		1.47	0	0	0		0	0	0		1.47	100	100	100		100	90	100
1.485	0	0	0		0	0	0		1.485	0	0	0		0	0	0		1.485	100	100	100		100	90	100
1.5	0	0	0		0	0	0		1.5	0	0	0		0	0	0		1.5	100	100	100		100	90	100
1.515	0	0	0		0	0	0		1.515	0	0	0		0	0	0		1.515	100	100	100		100	90	100
1.53	0	0	0		0	0	0		1.53	0	0	0		0	0	0		1.53	100	100	100		100	90	100
1.545	0	0	0		0	0	0		1.545	0	0	0		0	0	0		1.545	100	100	100		100	90	100
1.56	0	0	0		0	0	0		1.56	0	0	0		0	0	0		1.56	100	100	100		100	90	100
1.575	0	0	0		0	0	0		1.575	0	0	0		0	0	0		1.575	100	100	100		100	90	100
1.59	0	0	0		0	0	0		1.59	0	0	0		0	0	0		1.59	100	100	100		100	90	100
1.605	0	0	0		0	0	0		1.605	0	0	0		0	0	0		1.605	100	100	100		100	90	100
1.62	0	0	0		0	0	0		1.62	0	0	0		0	0	0		1.62	100	100	100		100	90	100
1.635	0	0	0		0	0	0		1.635	0	0	0		0	0	0		1.635	100	100	100		100	90	100
1.65	0	0	0		0	0	0		1.65	0	0	0		0	0	0		1.65	100	100	100		100	90	100
1.665	0	0	0		0	0	0		1.665	0	0	0		0	0	0		1.665	100	100	100		100	90	100
1.68	0	0	0		0	0	0		1.68	0	0	0		0	0	0		1.68	100	100	100		100	90	100
1.695	0	0	0		0	0	0		1.695	0	0	0		0	0	0		1.695	100	100	100		100	90	100
1.71	0	0	0		0	0	0		1.71	0	0	0		0	0	0		1.71	100	100	100		100	90	100
1.725	0	0	0		0	0	0		1.725	0	0	0		0	0	0		1.725	100	100	100		100	90	100
1.74	0	0	0		0	0	0		1.74	0	0	0		0	0	0		1.74	100	100	100		100	90	100
1.755	0	0	0		0	0	0		1.755	0	0	0		0	0	0		1.755	100	100	100		100	90	100
1.77	0	0	0		0	0	0		1.77	0	0	0		0	0	0		1.77	100	100	100		100	90	100
1.785	0	0	0		0	0	0		1.785	0	0	0		0	0	0		1.785	100	100	100		100	90	100
1.8	0	0	0		0	0	0		1.8	0	0	0		0	0	0		1.8	100	100	100		100	90	100
1.815	0	0	0		0	0	0		1.815	0	0	0		0	0	0		1.815	100	100	100		100	90	100
1.83	0	0	0		0	0	0		1.83	0	0	0		0	0	0		1.83	100	100	100		100	90	100
1.845	0	0	0		0	0	0		1.845	0	0	0		0	0	0		1.845	100	100	100		100	90	100
1.86	0	0	0		0	0	0		1.86	0	0	0		0	0	0		1.86	100	100	100		100	90	100
1.875	0	0	0		0	0	0		1.875	0	0	0		0	0	0		1.875	100	100	100		100	90	100
1.89	0	0	0		0	0	0		1.89	0	0	0		0	0	0		1.89	100	100	100		100	90	100
1.905	0	0	0		0	0	0		1.905	0	0	0		0	0	0		1.905	100	100	100		100	90	100
1.92	0	0	0		0	1	0		1.92	0	0	0		0	3.33333	0		1.92	100	100	100		100	93.3333	100
1.935	0	0	0		0	0	0		1.935	0	0	0		0	0	0		1.935	100	100	100		100	93.3333	100
1.95	0	0	0		0	0	0		1.95	0	0	0		0	0	0		1.95	100	100	100		100	93.3333	100
1.965	0	0	0		0	0	0		1.965	0	0	0		0	0	0		1.965	100	100	100		100	93.3333	100
1.98	0	0	0		0	0	0		1.98	0	0	0		0	0	0		1.98	100	100	100		100	93.3333	100
1.995	0	0	0		0	0	0		1.995	0	0	0		0	0	0		1.995	100	100	100		100	93.3333	100
2.01	0	0	0		0	0	0		2.01	0	0	0		0	0	0		2.01	100	100	100		100	93.3333	100
2.025	0	0	0		0	0	0		2.025	0	0	0		0	0	0		2.025	100	100	100		100	93.3333	100
2.04	0	0	0		0	0	0		2.04	0	0	0		0	0	0		2.04	100	100	100		100	93.3333	100
2.055	0	0	0		0	0	0		2.055	0	0	0		0	0	0		2.055	100	100	100		100	93.3333	100
2.07	0	0	0		0	0	0		2.07	0	0	0		0	0	0		2.07	100	100	100		100	93.3333	100
2.085	0	0	0		0	0	0		2.085	0	0	0		0	0	0		2.085	100	100	100		100	93.3333	100
2.1	0	0	0		0	0	0		2.1	0	0	0		0	0	0		2.1	100	100	100		100	93.3333	100
2.115	0	0	0		0	0	0		2.115	0	0	0		0	0	0		2.115	100	100	100		100	93.3333	100
2.13	0	0	0		0	1	0		2.13	0	0	0		0	3.33333	0		2.13	100	100	100		100	96.6667	100
2.145	0	0	0		0	0	0		2.145	0	0	0		0	0	0		2.145	100	100	100		100	96.6667	100
2.16	0	0	0		0	0	0		2.16	0	0	0		0	0	0		2.16	100	100	100		100	96.6667	100
2.175	0	0	0		0	1	0		2.175	0	0	0		0	3.33333	0		2.175	100	100	100		100	100	100
2.19	0	0	0		0	0	0		2.19	0	0	0		0	0	0		2.19	100	100	100		100	100	100
2.205	0	0	0		0	0	0		2.205	0	0	0		0	0	0		2.205	100	100	100		100	100	100
2.22	0	0	0		0	0	0		2.22	0	0	0		0	0	0		2.22	100	100	100		100	100	100
2.235	0	0	0		0	0	0		2.235	0	0	0		0	0	0		2.235	100	100	100		100	100	100
2.25	0	0	0		0	0	0		2.25	0	0	0		0	0	0		2.25	100	100	100		100	100	100
2.265	0	0	0		0	0	0		2.265	0	0	0		0	0	0		2.265	100	100	100		100	100	100
2.28	0	0	0		0	0	0		2.28	0	0	0		0	0	0		2.28	100	100	100		100	100	100
2.295	0	0	0		0	0	0		2.295	0	0	0		0	0	0		2.295	100	100	100		100	100	100
2.31	0	0	0		0	0	0		2.31	0	0	0		0	0	0		2.31	100	100	100		100	100	100
2.325	0	0	0		0	0	0		2.325	0	0	0		0	0	0		2.325	100	100	100		100	100	100
2.34	0	0	0		0	0	0		2.34	0	0	0		0	0	0		2.34	100	100	100		100	100	100
2.355	0	0	0		0	0	0		2.355	0	0	0		0	0	0		2.355	100	100	100		100	100	100
2.37	0	0	0		0	0	0		2.37	0	0	0		0	0	0		2.37	100	100	100		100	100	100
2.385	0	0	0		0	0	0		2.385	0	0	0		0	0	0		2.385	100	100	100		100	100	100
2.4	0	0	0		0	0	0		2.4	0	0	0		0	0	0		2.4	100	100	100		100	100	100
2.415	0	0	0		0	0	0		2.415	0	0	0		0	0	0		2.415	100	100	100		100	100	100
2.43	0	0	0		0	0	0		2.43	0	0	0		0	0	0		2.43	100	100	100		100	100	100
2.445	0	0	0		0	0	0		2.445	0	0	0		0	0	0		2.445	100	100	100		100	100	100
2.46	0	0	0		0	0	0		2.46	0	0	0		0	0	0		2.46	100	100	100		100	100	100
2.475	0	0	0		0	0	0		2.475	0	0	0		0	0	0		2.475	100	100	100		100	100	100
2.49	0	0	0		0	0	0		2.49	0	0	0		0	0	0		2.49	100	100	100		100	100	100
2.505	0	0	0		0	0	0		2.505	0	0	0		0	0	0		2.505	100	100	100		100	100	100
2.52	0	0	0		0	0	0		2.52	0	0	0		0	0	0		2.52	100	100	100		100	100	100
2.535	0	0	0		0	0	0		2.535	0	0	0		0	0	0		2.535	100	100	100		100	100	100
2.55	0	0	0		0	0	0		2.55	0	0	0		0	0	0		2.55	100	100	100		100	100	100
2.565	0	0	0		0	0	0		2.565	0	0	0		0	0	0		2.565	100	100	100		100	100	100
2.58	0	0	0		0	0	0		2.58	0	0	0		0	0	0		2.58	100	100	100		100	100	100
2.595	0	0	0		0	0	0		2.595	0	0	0		0	0	0		2.595	100	100	100		100	100	100
2.61	0	0	0		0	0	0		2.61	0	0	0		0	0	0		2.61	100	100	100		100	100	100
2.625	0	0	0		0	0	0		2.625	0	0	0		0	0	0		2.625	100	100	100		100	100	100
2.64	0	0	0		0	0	0		2.64	0	0	0		0	0	0		2.64	100	100	100		100	100	100
2.655	0	0	0		0	0	0		2.655	0	0	0		0	0	0		2.655	100	100	100		100	100	100
2.67	0	0	0		0	0	0		2.67	0	0	0		0	0	0		2.67	100	100	100		100	100	100
2.685	0	0	0		0	0	0		2.685	0	0	0		0	0	0		2.685	100	100	100		100	100	100
2.7	0	0	0		0	0	0		2.7	0	0	0		0	0	0		2.7	100	100	100		100	100	100
2.715	0	0	0		0	0	0		2.715	0	0	0		0	0	0		2.715	100	100	100		100	100	100
2.73	0	0	0		0	0	0		2.73	0	0	0		0	0	0		2.73	100	100	100		100	100	100
2.745	0	0	0		0	0	0		2.745	0	0	0		0	0	0		2.745	100	100	100		100	100	100
2.76	0	0	0		0	0	0		2.76	0	0	0		0	0	0		2.76	100	100	100		100	100	100
2.775	0	0	0		0	0	0		2.775	0	0	0		0	0	0		2.775	100	100	100		100	100	100
2.79	0	0	0		0	0	0		2.79	0	0	0		0	0	0		2.79	100	100	100		100	100	100
2.805	0	0	0		0	0	0		2.805	0	0	0		0	0	0		2.805	100	100	100		100	100	100
2.82	0	0	0		0	0	0		2.82	0	0	0		0	0	0		2.82	100	100	100		100	100	100
2.835	0	0	0		0	0	0		2.835	0	0	0		0	0	0		2.835	100	100	100		100	100	100
2.85	0	0	0		0	0	0		2.85	0	0	0		0	0	0		2.85	100	100	100		100	100	100
2.865	0	0	0		0	0	0		2.865	0	0	0		0	0	0		2.865	100	100	100		100	100	100
2.88	0	0	0		0	0	0		2.88	0	0	0		0	0	0		2.88	100	100	100		100	100	100
2.895	0	0	0		0	0	0		2.895	0	0	0		0	0	0		2.895	100	100	100		100	100	100
2.91	0	0	0		0	0	0		2.91	0	0	0		0	0	0		2.91	100	100	100		100	100	100
2.925	0	0	0		0	0	0		2.925	0	0	0		0	0	0		2.925	100	100	100		100	100	100
2.94	0	0	0		0	0	0		2.94	0	0	0		0	0	0		2.94	100	100	100		100	100	100
2.955	0	0	0		0	0	0		2.955	0	0	0		0	0	0		2.955	100	100	100		100	100	100
2.97	0	0	0		0	0	0		2.97	0	0	0		0	0	0		2.97	100	100	100		100	100	100
2.985	0	0	0		0	0	0		2.985	0	0	0		0	0	0		2.985	100	100	100		100	100	100
3	0	0	0		0	0	0		3	0	0	0		0	0	0		3	100	100	100		100	100	100

## Sheet: Sheet2
Table Analyzed	Branching point distance BDtoPV
Column A	Jag1+/+
vs.	vs.
Column B	Jag1Ndr/Ndr
Kolmogorov-Smirnov test
P value	0.9985
Exact or approximate P value?	Approximate
P value summary	ns
Significantly different? (P < 0.05)	No
Kolmogorov-Smirnov D	0.04217
